# Supplementary material for: New treatment alternatives for primary and metastatic colorectal cancer by an integrated transcriptome and network analyses
Source: PubMed Central journal article supplement (PMC11021540; doi:10.1038/s41598-024-59101-8), 2024-04-16
Supplement: 41598_2024_59101_MOESM1_ESM.pdf [file 41598_2024_59101_MOESM1_ESM.pdf]

## Supplementary Information

# New treatment alternatives for primary and metastatic colorectal cancer by an integrated transcriptome and network analyses

**Caner Karaca<sup>1+</sup>, Ezgi Demir Karaman<sup>2+</sup>, Asım Leblebici<sup>1</sup>, Hasan Kurter<sup>1</sup>, Hulya Ellidokuz<sup>3</sup>, Altug Koc<sup>1</sup>, Ender Berat Ellidokuz<sup>4</sup>, Zerrin Isik<sup>2\*</sup> and Yasemin Basbinar<sup>5\*</sup>**

<sup>1</sup> Department of Translational Oncology, Institute of Health Sciences, Dokuz Eylul University, Izmir, Turkey

<sup>2</sup> Department of Computer Engineering, Faculty of Engineering, Dokuz Eylul University, Izmir, Turkey

<sup>3</sup> Department of Preventive Oncology, Institute of Oncology, Dokuz Eylul University, Izmir, Turkey

<sup>4</sup> Department of Gastroenterology, Faculty of Medicine, Dokuz Eylul University, Izmir, Turkey

<sup>5</sup> Department of Translational Oncology, Institute of Oncology, Dokuz Eylul University, Izmir, Turkey

\* [zerrin@cs.deu.edu.tr](mailto:zerrin@cs.deu.edu.tr) , [ybaskin65@gmail.com](mailto:ybaskin65@gmail.com)

<sup>+</sup> these authors contributed equally to this work

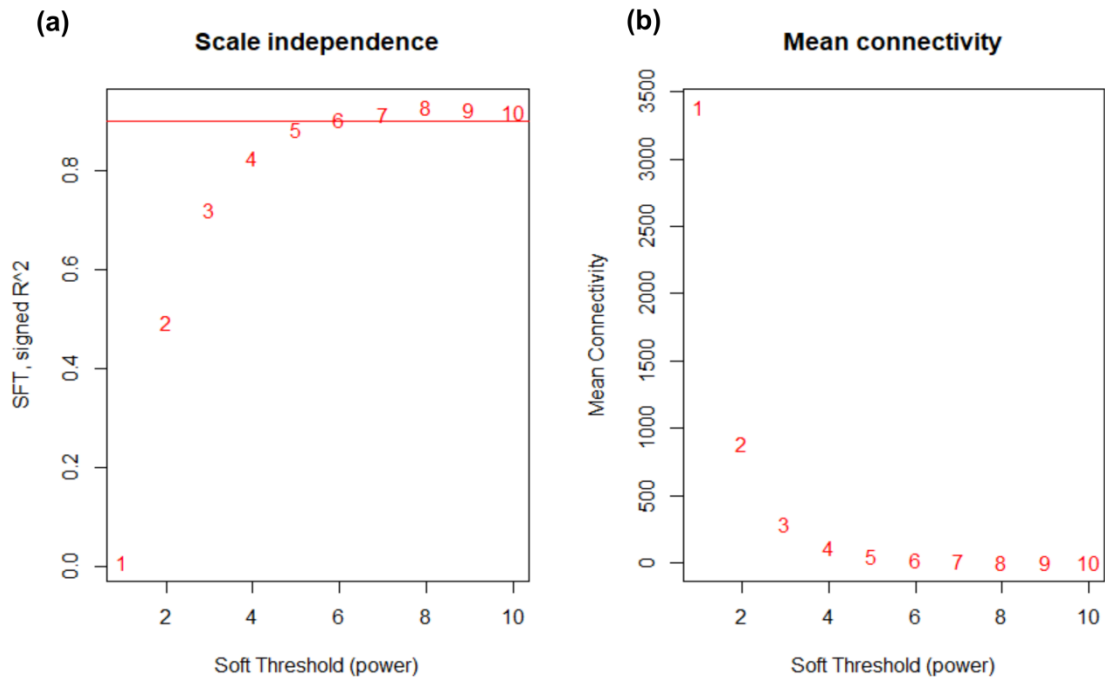

**Supplementary Figure S1.** Determination of soft-thresholding power in the WGCNA. **(a)** Analysis of the scale-free fit index for various soft-thresholding powers ( $\beta$ ). **(b)** Analysis of the mean connectivity for various soft-thresholding powers.

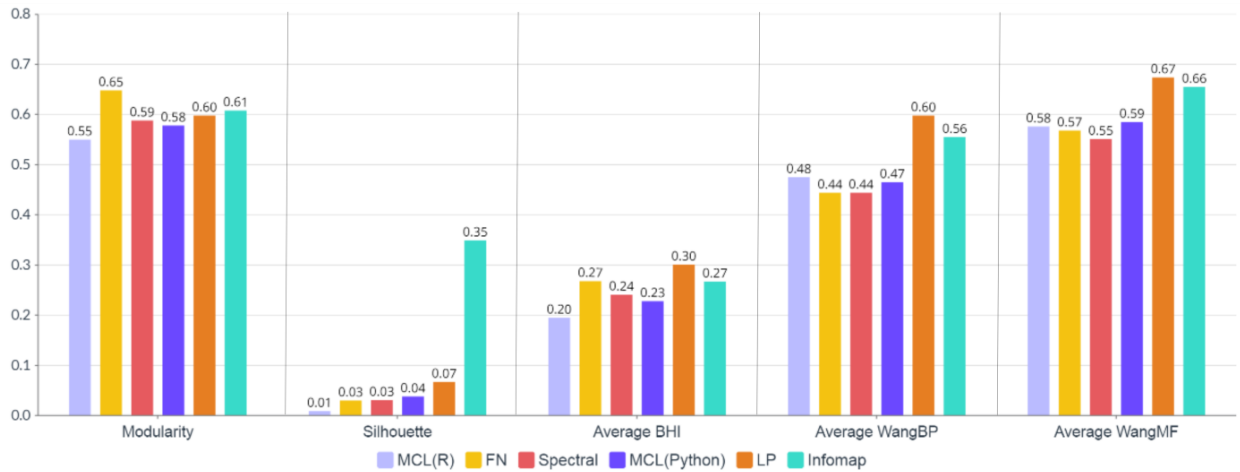

**Supplementary Figure S2.** Performance comparison of clustering algorithms (Markov clustering (MCL), Fuzzy neighborhood (FN), Spectral, Label Propagation (LP), Infomap) applied for the phenotype of metastasis developed from primary colon cancer.

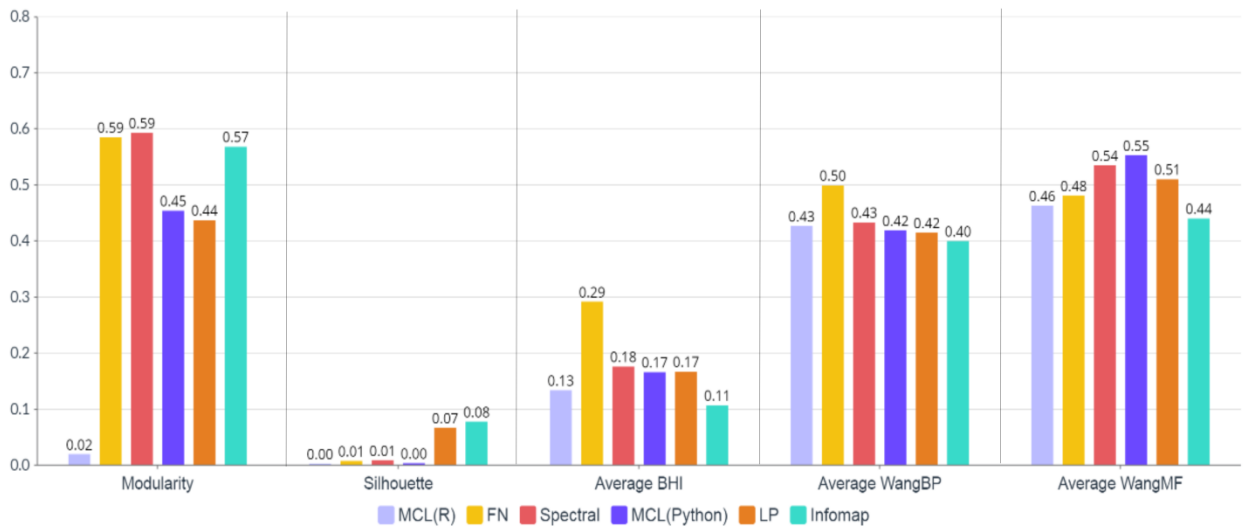

**Supplementary Figure S3.** Performance comparison of clustering algorithms (Markov clustering (MCL), Fuzzy neighborhood (FN), Spectral, Label Propagation (LP), Infomap) applied for the phenotype of primary colon cancer developed from normal samples.

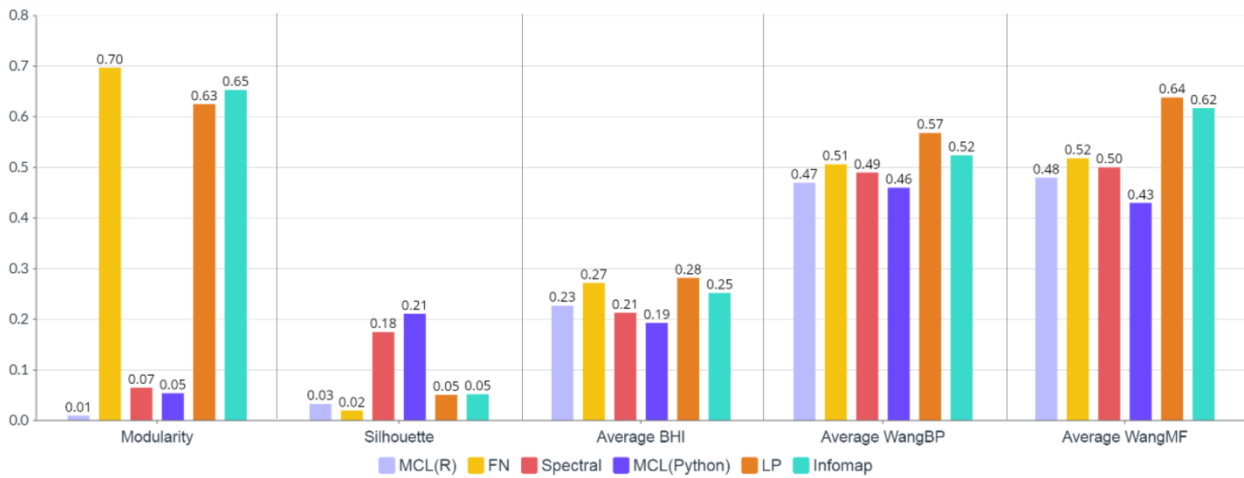

**Supplementary Figure S4.** Performance comparison of clustering algorithms (Markov clustering (MCL), Fuzzy neighborhood (FN), Spectral, Label Propagation (LP), Infomap) applied for the phenotype of liver metastasis development from normal colon samples.

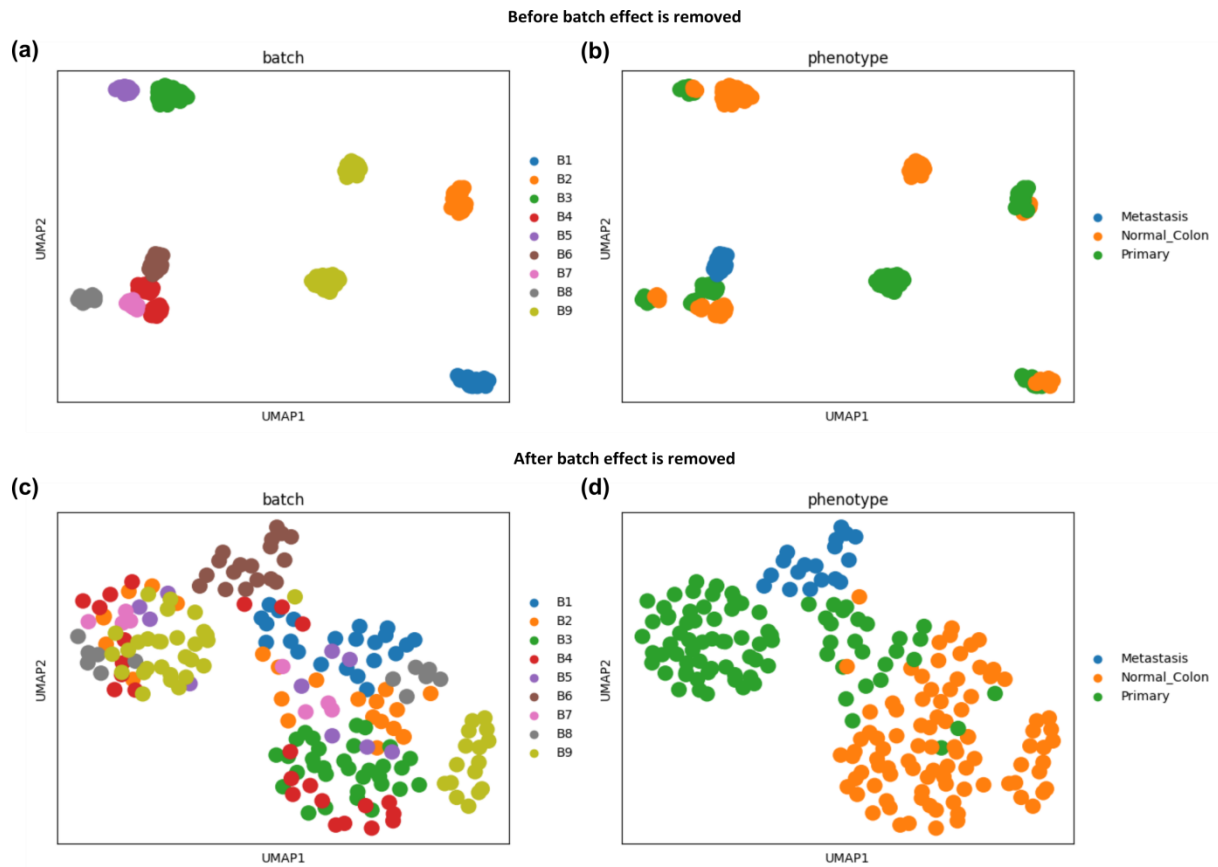

**Supplementary Figure S5.** UMAP plots of the integrated data before and after batch effect removal **(a)** Nine datasets without batch effect removal, **(b)** Three phenotypes without batch effect removal, **(c)** Nine datasets after batch effect removal, **(d)** Three phenotypes after batch effect removal.

**Supplementary Table S1.** Significant modules associated with three key phenotypes.

| Module Identifier | Main Module Name        | Associated phenotypes                                        | Number of genes |
|-------------------|-------------------------|--------------------------------------------------------------|-----------------|
| m2                | Metastasis from primary | Development of liver metastases from primary colon cancer    | 733             |
| m6, m7            | Primary from normal     | Development of primary colon cancer from normal colon tissue | 7537            |
| m16, m17, m18     | Metastasis from normal  | Development of liver metastases from normal colon tissue     | 2453            |

**Supplementary Table S2.** Gene and interaction numbers in tissue-specific FINs

| Module Identifier | Main Module Name        | Number of genes in FIN | Number of interactions between the genes in FIN |
|-------------------|-------------------------|------------------------|-------------------------------------------------|
| m2                | Metastasis from primary | 340                    | 1031                                            |
| m6, m7            | Primary from normal     | 4353                   | 44265                                           |
| m16, m17, m18     | Metastasis from normal  | 1347                   | 5301                                            |

**Supplementary Table S3.** Summary of significant submodules detected by the best performing LP and Infomap clustering algorithms for the phenotype of metastasis developed from primary colon cancer.

| Clustering Algorithm | Submodule ID | Number of Genes | BHI score | Wang_BP | Wang_MF | Number of downregulated genes | Number of upregulated genes |
|----------------------|--------------|-----------------|-----------|---------|---------|-------------------------------|-----------------------------|
| LP                   | 2            | 40              | 0,176     | 0,342   | 0,441   | 0                             | 24                          |
|                      | 4            | 48              | 0,145     | 0,302   | 0,338   | 0                             | 29                          |
|                      | 7            | 55              | 0,102     | 0,257   | 0,420   | 1                             | 36                          |
|                      | 8            | 7               | 0,200     | 0,499   | 0,487   | 1                             | 6                           |
|                      | 9            | 5               | 0,500     | 0,734   | 0,726   | 0                             | 1                           |
|                      | 14           | 13              | 0,327     | 0,434   | 0,686   | 0                             | 1                           |
|                      | 15           | 7               | 0,333     | 0,594   | 0,605   | 1                             | 1                           |
|                      | 17           | 8               | 0,143     | 0,394   | 0,686   | 0                             | 6                           |
|                      | 20           | 5               | 0,500     | 0,651   | 0,729   | 0                             | 5                           |
| Infomap              | 1            | 28              | 0,340     | 0,458   | 0,502   | 0                             | 20                          |
|                      | 2            | 22              | 0,318     | 0,447   | 0,580   | 0                             | 16                          |
|                      | 3            | 16              | 0,321     | 0,455   | 0,461   | 0                             | 14                          |
|                      | 7            | 12              | 0,326     | 0,437   | 0,688   | 0                             | 1                           |
|                      | 8            | 10              | 0,500     | 0,491   | 0,687   | 0                             | 9                           |
|                      | 12           | 10              | 0,255     | 0,347   | 0,707   | 0                             | 5                           |
|                      | 13           | 8               | 0,500     | 0,522   | 0,840   | 0                             | 8                           |
|                      | 15           | 7               | 0,381     | 0,623   | 0,711   | 0                             | 7                           |
|                      | 16           | 7               | 0,333     | 0,594   | 0,605   | 1                             | 1                           |
|                      | 19           | 6               | 0,300     | 0,509   | 0,637   | 0                             | 1                           |
| 25                   | 5            | 0,500           | 0,734     | 0,726   | 0       | 1                             |                             |

**Supplementary Table S4.** Summary of significant submodules detected by the best performing FN and Spectral clustering algorithms for the phenotype of primary colon cancer developed from normal samples.

| Clustering Algorithm | Submodule ID | Number of Genes | BHI score | Wang_BP | Wang_MF | Number of downregulated genes | Number of upregulated genes |
|----------------------|--------------|-----------------|-----------|---------|---------|-------------------------------|-----------------------------|
| FN                   | 1            | 729             | 0,099     | 0,273   | 0,517   | 0                             | 42                          |
|                      | 2            | 1014            | 0,204     | 0,292   | 0,545   | 2                             | 83                          |
|                      | 7            | 504             | 0,100     | 0,219   | 0,406   | 2                             | 19                          |
|                      | 8            | 193             | 0,412     | 0,872   | 0,861   | 0                             | 2                           |
|                      | 43           | 7               | 0,500     | 0,850   | 0,985   | 0                             | 0                           |
|                      | 51           | 6               | 0,500     | 0,948   | 0,937   | 0                             | 1                           |
| Spectral             | 0            | 1039            | 0,209     | 0,287   | 0,545   | 2                             | 74                          |
|                      | 2            | 839             | 0,168     | 0,266   | 0,501   | 4                             | 44                          |
|                      | 4            | 6               | 0,500     | 0,948   | 0,937   | 0                             | 1                           |
|                      | 16           | 28              | 0,251     | 0,398   | 0,632   | 1                             | 4                           |
|                      | 29           | 215             | 0,407     | 0,836   | 0,840   | 0                             | 3                           |
|                      | 42           | 9               | 0,268     | 0,420   | 0,727   | 0                             | 0                           |
|                      | 53           | 71              | 0,261     | 0,418   | 0,488   | 2                             | 3                           |

**Supplementary Table S5.** Summary of significant submodules detected by the best performing FN clustering algorithm for the phenotype of liver metastasis development from normal colon samples.

| Clustering Algorithm | Submodule ID | Number of Genes | BHI score | Wang_BP | Wang_MF | Number of downregulated genes | Number of upregulated genes |
|----------------------|--------------|-----------------|-----------|---------|---------|-------------------------------|-----------------------------|
| FN                   | 1            | 151             | 0,136     | 0,315   | 0,528   | 19                            | 2                           |
|                      | 3            | 123             | 0,129     | 0,281   | 0,588   | 14                            | 1                           |
|                      | 4            | 123             | 0,102     | 0,274   | 0,471   | 25                            | 4                           |
|                      | 5            | 75              | 0,115     | 0,281   | 0,552   | 28                            | 3                           |
|                      | 9            | 28              | 0,167     | 0,349   | 0,596   | 2                             | 1                           |
|                      | 11           | 122             | 0,061     | 0,267   | 0,357   | 15                            | 2                           |
|                      | 12           | 133             | 0,104     | 0,269   | 0,554   | 35                            | 1                           |
|                      | 13           | 22              | 0,234     | 0,446   | 0,63    | 3                             | 0                           |
|                      | 16           | 12              | 0,129     | 0,37    | 0,665   | 2                             | 0                           |
|                      | 20           | 6               | 0,500     | 0,636   | 0,695   | 2                             | 1                           |

**Supplementary Table S7.** Significant modules were selected to analyze the occurrence of two phenotypes in the validation dataset

| Module Identifier | Main Module Name                         | Associated phenotypes                                                       | Number of genes in the module |
|-------------------|------------------------------------------|-----------------------------------------------------------------------------|-------------------------------|
| m5, m12           | Primary from normal                      | Development of primary colon cancer from normal colon tissue                | 6504                          |
| m14, m15          | Primary colon and metastasis from normal | Development of primary colon cancer and metastasis from normal colon tissue | 2745                          |

**Supplementary Table S8.** Common gene counts in significant modules in validation and training datasets.

| Module name                            | Associated phenotypes                                        | Number of Common Genes in both Validation and Training Set |
|----------------------------------------|--------------------------------------------------------------|------------------------------------------------------------|
| Normal to Primary Colon                | Development of primary colon cancer from normal colon tissue | 61                                                         |
| Normal to Primary Colon and Metastasis | Primary colon cancer and metastasis from normal colon tissue | 42                                                         |

**Supplementary Table S12.** Drug screening results obtained for targeting biomarkers in treatment of primary colon cancer.

| Target Protein (Biomarker) | Compound Name | Drug Mode of Action | Web Resource                              |
|----------------------------|---------------|---------------------|-------------------------------------------|
| CDKN3                      | AT-7519       | Inhibitor           | ChEMBL Interactions                       |
| CDKN3                      | AZD-5438      | Inhibitor           | ChEMBL Interactions                       |
| CDKN3                      | PHA-793887    | Inhibitor           | ChEMBL Interactions                       |
| CDKN3                      | RONICICLIB    | Inhibitor           | ChEMBL Interactions                       |
| EZH2                       | Lirametostat  | Inhibitor           | GuideToPharmacology, TTD                  |
| EZH2                       | PF-06821497   | Inhibitor           | GuideToPharmacology                       |
| EZH2                       | TAZEMETOSTAT  | Inhibitor           | JAX-CKB, GuideToPharmacology, TTD, OncoKB |
| NEK2                       | GSK-579289A   | Inhibitor           | GuideToPharmacology                       |
| NEK2                       | HESPERADIN    | Inhibitor           | DTC                                       |
| TTK                        | Empesertib    | Inhibitor           | ChEMBL Interactions, GuideToPharmacology  |
| TTK                        | BAY-1217389   | Inhibitor           | ChEMBL Interactions                       |
| TTK                        | HESPERADIN    | Inhibitor           | DTC                                       |

**Supplementary Table S13.** Drug information targeting biomarkers for treatment of liver metastatic colon cancer.

| <b>Target Protein (Biomarker)</b> | <b>Compound Name</b>        | <b>Drug Mode of Action</b> | <b>Resource</b>     |
|-----------------------------------|-----------------------------|----------------------------|---------------------|
| IL10RB                            | PEGINTERFERON $\lambda$ -1A | agonist                    | Chembl Interactions |
